# Supplementary material
Source: Research Square preprint supplement (doi:10.21203/rs.3.rs-9187098/v1)
Supplement: Supplementary file 1 [file cd3f7db877b7b34a9ef0abf9.docx]

**Supplementary Information**

**DNA and its rectangular origami nanostructure as substrates for Raman signal enhancement**

Priya Dangi1.2, Aniket Chowdhury1, Shivangi Verma1, Chandrachur Mukherjee2.3, Kamalika Ghosh1, Nidhi Maharwal1,2, Rashmi Shrivastava1.2*and Shovan K Majumder1.2

*1Laser Biomedical Applications Division, Raja Ramanna Centre for Advanced Technology, Indore-452013, India*

*2Homi Bhabha National Institute (HBNI), Training School Complex Anushakti Nagar, Mumbai-400094, India*

*3High Energy Lasers and Optics Division, Raja Ramanna Centre for Advanced Technology, Indore-452013, India*

*Corresponding author: E mail: rshrivastava@rrcat.gov.in

Supplementary Information

**
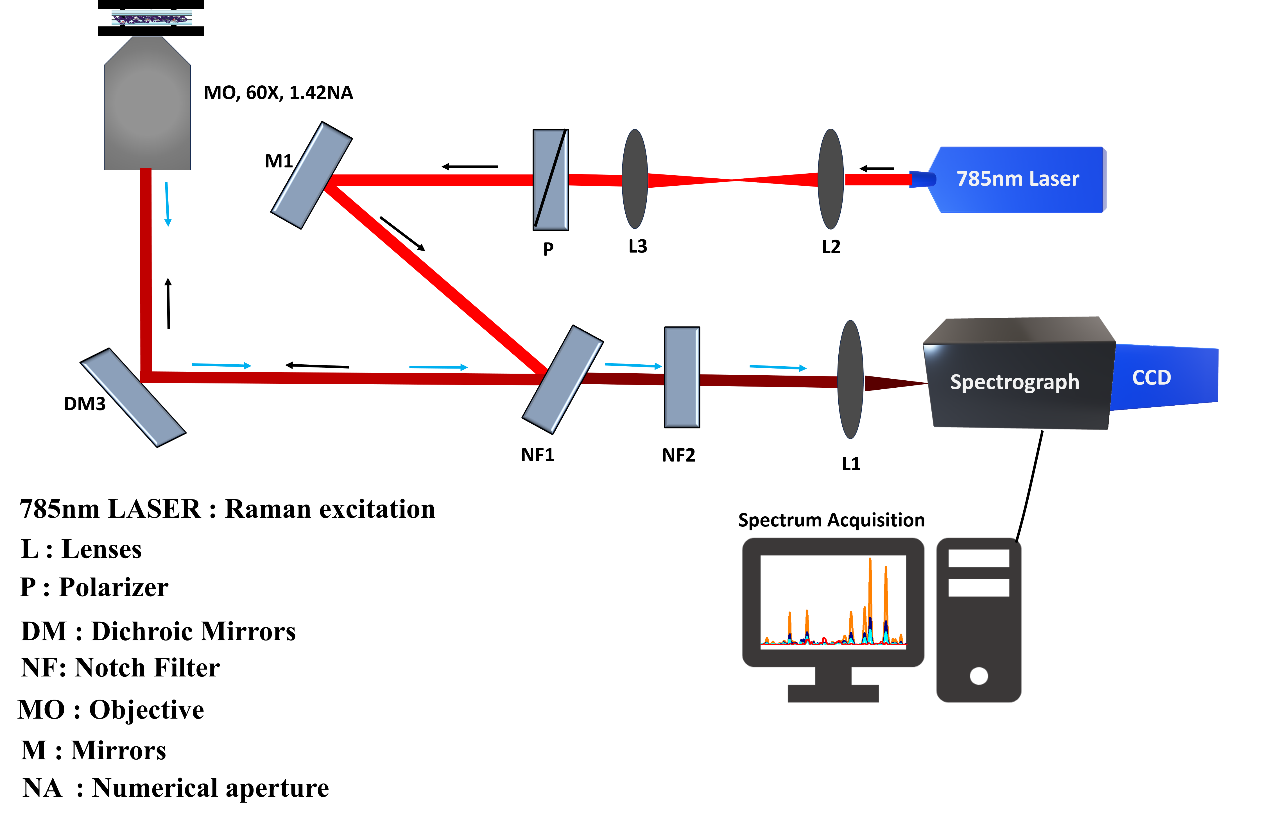
**

**Supplementary Fig. 1 Schematic of the Raman measurement setup.**

Raman measurements were performed in reflection geometry using a 785 nm excitation laser (~20 mW at the sample plane) focused with a 60× oil immersion objective on an inverted microscope. The scattered signal was collected by the same objective and directed to a spectrograph coupled to a thermoelectrically cooled CCD detector (−80 °C).


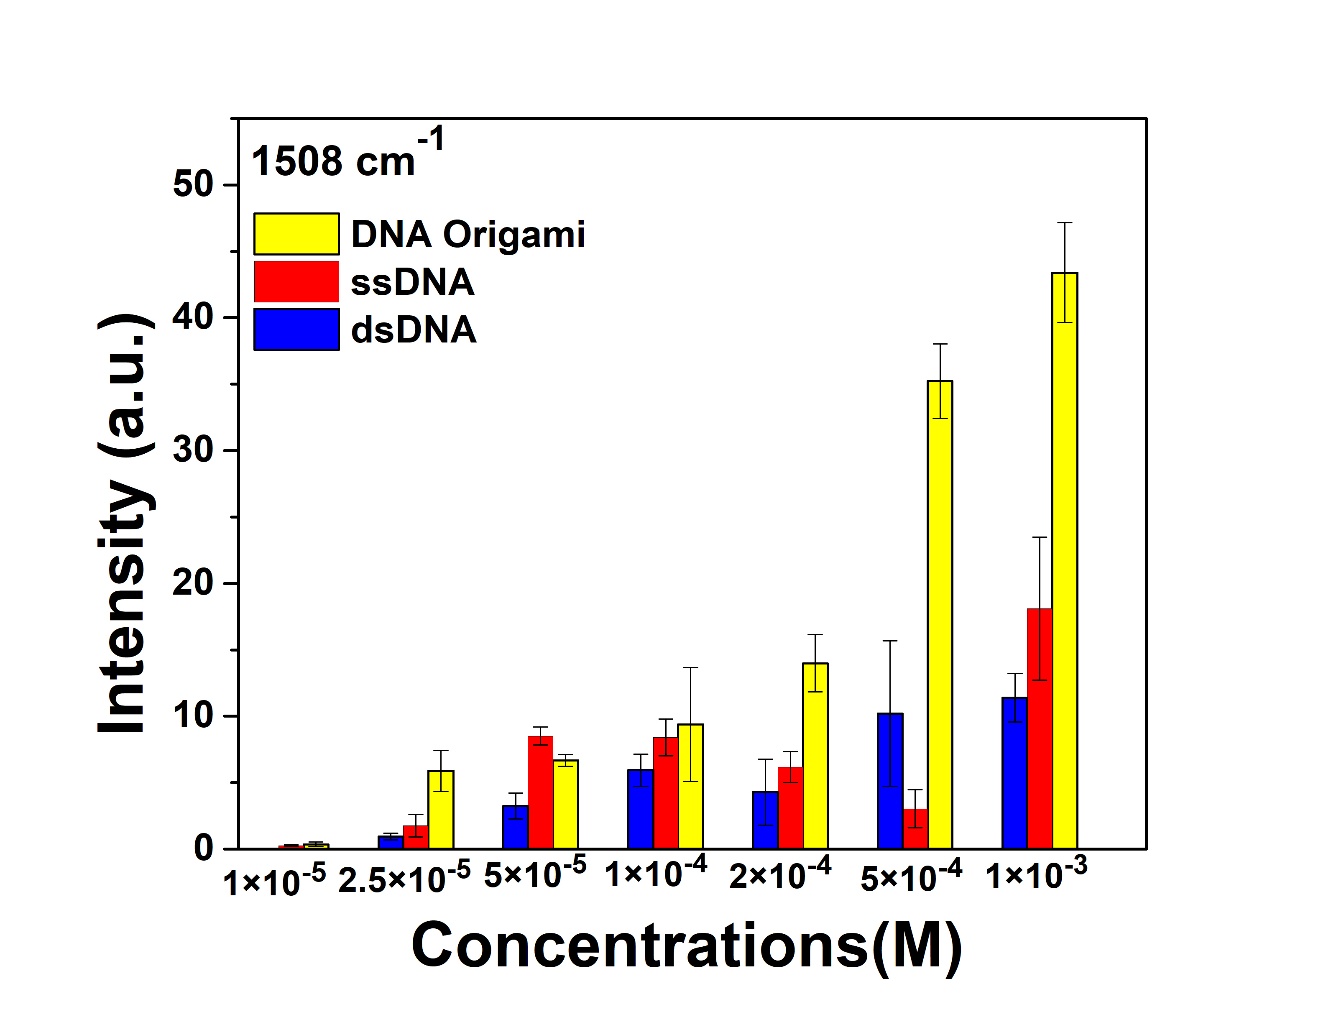


**Supplementary Fig. 2 Concentration dependent Raman measurements of R6G on different DNA substrates.**Bar graph showing the log₁₀-transformed Raman intensity of the 1508 cm⁻¹ vibrational mode of R6G measured on three DNA substrates- ssDNA, dsDNA, and rectangular DNA origami at different R6G concentrations. A consistent decrease in Raman intensity with decreasing R6G concentration is observed for the DNA origami substrate, whereas no clear monotonic trend is observed for ssDNA and dsDNA substrates. Bars represent the mean Raman intensity, and error bars indicate the standard deviation from 15 independent measurements.


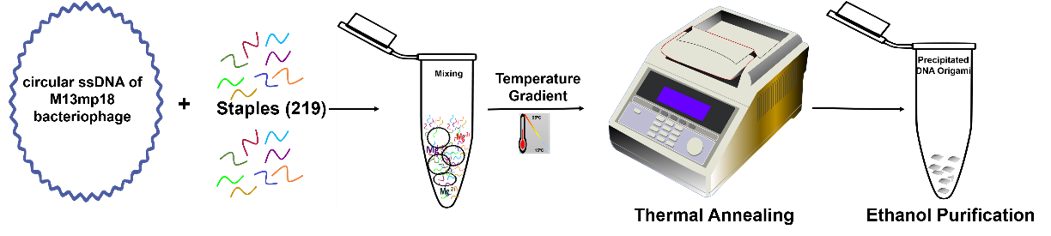


**Supplementary Fig.3** **Synthesis of rectangular DNA origami nanostructure**

Schematic illustration of the synthesis workflow for purified rectangular DNA origami, where the M13mp18 circular ssDNA scaffold and complementary oligonucleotide staples are mixed and assembled via thermal annealing. Briefly, the mixture is subjected to an initial high denaturation temperature followed by a gradual cooling process, enabling the scaffold to fold into the designed two-dimensional structure. The assembled DNA origami is subsequently purified using ethanol precipitation, resulting in purified rectangular DNA origami nanostructures


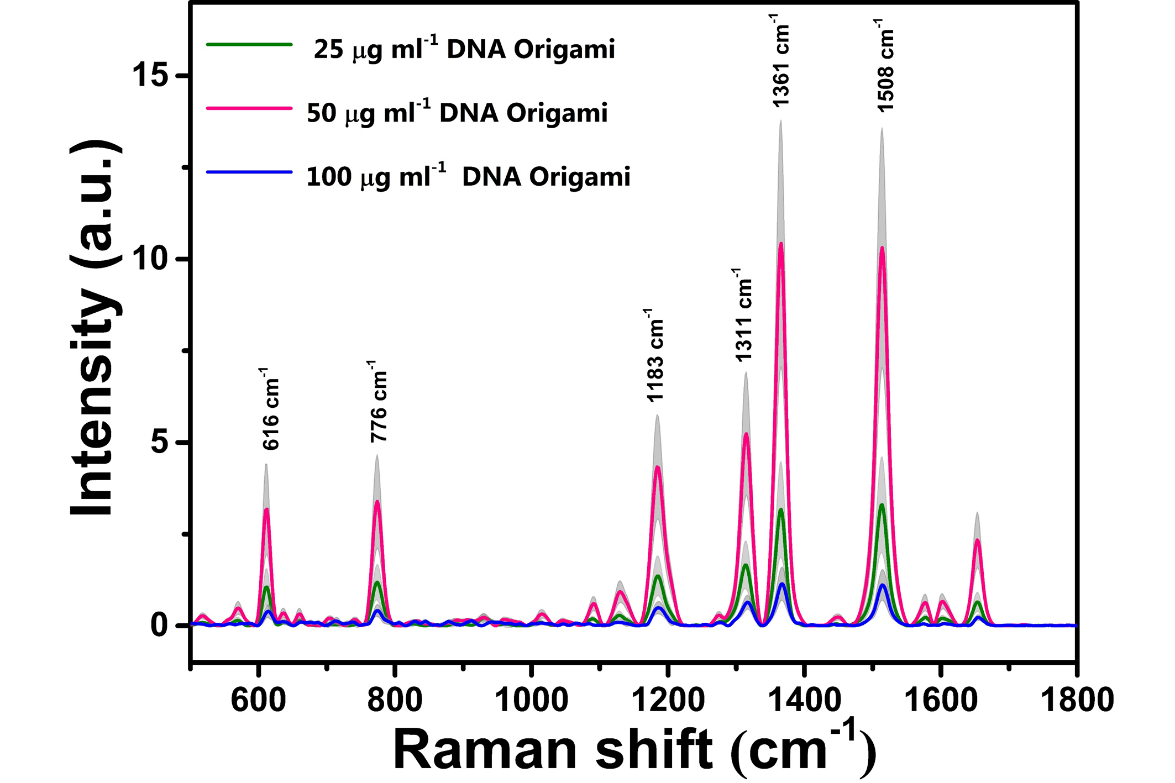


**Supplementary Fig. 4 Effect of DNA origami concentration on Raman intensity of R6G.**Raman intensities of 5 x 10-4 M R6G measured in the presence of different concentrations of rectangular DNA origami (25 µg ml⁻¹, 50 µg ml⁻¹, and 100 µg ml⁻¹). The spectra show that the maximum Raman enhancement is observed at 50 µg ml⁻¹ DNA origami.

**Supplementary Table 1.** ssDNA sequences used in this study; these sequences also serve as staple strands for the assembly of the rectangular DNA origami structure.

| **Sl. No.** | **Staple Sequences** |
| --- | --- |
| 1 | CAAAGGGCGAAAAACCCTGAGAAGT |
| 2 | ATTAAAGACGAGTAAAAGAGTCTGACTTGCCT |
| 3 | TAGGGTTGAGTGTTGTACCGTTGTAGCCGGTT |
| 4 | AATCCCTTATAAATCAGGGTGGTTT |
| 5 | ATCCTGTTTGATGGTGAACAGCTGA |
| 6 | CGGTCCACGCTGGTTTAGAGAGTTGCAGCAAG |
| 7 | ACGGTACGCCAGAATCGTCTATCAAGACAGGA |
| 8 | GTTTTTACCTTGCTGGTAATATCGAAAAACG |
| 9 | AGGCCACACGTGGACTCCAACGT |
| 10 | CAAATTATCCAGTTTGGAACAAGAGTCCACT |
| 11 | TGCGTATTGGGCGCCAAAAGAATAGCCCGAGA |
| 12 | TTCTTTTAGCTGCATTAATGAATGAAATTGT |
| 13 | GACGGGCGTTCCGAAATCGGCAA |
| 14 | TTGCCCTGCCCGCTTTCCAGTCGATACGAGCC |
| 15 | TGGCCCTGGCCCCAGCAGGCGAAA |
| 16 | GAGTAGAACGCTCAATCGTCTGAACATTCTGG |
| 17 | AGAGGAATACTTCTTTGGCAGATTCACGGTCAT |
| 18 | AGCTAACTCACATTAAGGGTGCCTAATGAGTG |
| 19 | CCAGCCATTGCAACAGCAGAACAATATTACCG |
| 20 | CTCATGGACCTGAAAGCGTAAGAATTAGTCTT |
| 21 | ATTTTGAGAACTCAAACTATCGGTAATCAGTG |
| 22 | TTACATTGATTAGTAATAACATCTCCATCACG |
| 23 | AGCTGTTTCCTGTGTCGGCCAACGCGCGGGG |
| 24 | TATCCGCTGAGGATCCCCGGGTACTGCGGGCC |
| 25 | ACACAACGGAAACCTGTCGTGCCCACCAGTGA |
| 26 | GGAAGCATGCCAAGCTTGCATGCAAAGGGGGA |
| 27 | AAGCCTGTTGCGTTGCGCTCACTTCACCGCC |
| 28 | CCAACAGAAACATCGCCATTAAAAACACCGCC |
| 29 | ATCATCAGTCACACGACAGCAGAAGATACTGT |
| 30 | TCCCAGTCACGACGTTGGTAACGCCAGGGTTT |
| 31 | TATTTTTGAATGGCTATACGTGGCACAGACAA |
| 32 | TAATGCGCAGCAGCAAATGAAAAACAAACCCTC |
| 33 | GCCCTAAGATAGAACCCTTCTGAAATACCTAC |
| 34 | GAACCACCCAGTAATAAAAGGGAATGGATTAT |
| 35 | TGGGAAGGGCGATCGGCGAGCTCGAATTCGTA |
| 36 | TCTTCGCTAACCAGGCAAAGCGCCGGATTGAC |
| 37 | GCTGGCGCTGCAGGTCGACTCTACACAATTCC |
| 38 | TGTGCTGGCCAGCTTTCCGGCACGTAGATGGG |
| 39 | TAAGTTGGTAAAACGACGGCCAGTAAAGTGTA |
| 40 | TGCAACAGAATCAACAGTTGAAAGAGAGCCGT |
| 41 | GCGCAAAAACAGAGGTTCTAAAATATCTTCTC |
| 42 | GACAGTATCGGCCTCAAGTTTGAGGGGACGAC |
| 43 | GCTGAACCTCAAATATTCTAAAGCATCACCTT |
| 44 | AATCAATTAGAAGTATTAGACTTTTGCCCGA |
| 45 | GTTGGCATGCCACGCTGAGAGCCGAACTGATA |
| 46 | AAGGTTAGAGGCGGTCAGTATTAATACCGAAC |
| 47 | CGTGGGAACAAACGGCATTCGCCATTCAGGCT |
| 48 | CGTAATGGATCAACATTAAATGTGAGATTGTA |
| 49 | CGTTGGTCGCTTCTGGTGCCGGAATTACGCCA |
| 50 | CGCATCGATTCGCGTCTGGCCTTGTTAATATT |
| 51 | ATCTGCCGGAAGATCGCACTCCACAAGGCGAT |
| 52 | CAATAGATGTAACATTATCATTTTCAGATGAT |
| 53 | TCGGATTTAGGAGCACACCAGAAGGAGAGAAA |
| 54 | TTTTTTAACCAATAGGTTGTTAAATCAGCTCA |
| 55 | ACTCGTATTAAATCCTTACAAACAATTCGACA |
| 56 | ACGTTATTTTGTTTGGATTATACTTCAAAATT |
| 57 | AGTTTGAAATACATTTGAGGATTATCTGGTCA |
| 58 | AGAAACCTAACAACTAATAGATTGAATTGAGG |
| 59 | AGCCCCAAAAACAGGAAGCGAGTAACAACCCG |
| 60 | TAAGCAAAACTAGCATGTCAATCATCACCATC |
| 61 | TGTAAACCCTGTAGCCAGCTTTCGATAGGTCA |
| 62 | TTGTTAAAAACAAGAGAATCGATTGATAAATT |
| 63 | TAAATTTAACGCCATCAAAAATATAACCGTGC |
| 64 | GGCAATTCGAAATTGCGTAGATTTACAATAAC |
| 65 | TAATCCGGAATTATCAATGAATATACAGAAAG |
| 66 | GGCTATCAGGTCATTGTTGAGAGATCTACAAA |
| 67 | GTTAGAACCTACCATATCTGAATAATGGAAGG |
| 68 | ATTTGCACCCAAGTTACAAAATCGAGCAAAAG |
| 69 | AAATAAAATCAATATAATCCTGAAATTTTAAA |
| 70 | ACGTCAGTCATATTCCTGATTATGCGGAACAA |
| 71 | GCCGGAGACAGTCAAATATGTACCCCGGTTGA |
| 72 | AATATGATGCCTGAGTAATGTGTAAAAATTAA |
| 73 | TTCTAGCGAACGGTAATCGTAAATATTTAAAT |
| 74 | AATGCCGTTTTTAGAACCCTCATCTAAATCGG |
| 75 | GCTATTTCCTGAGAGTCTGGAGCAATTCGCAT |
| 76 | GGATTCGCAAACAAAATTAATTACTATATGTG |
| 77 | GGTGAGTAACAGTACCTGAATTACCTTCAGGC |
| 78 | GAGAAGCCTTTATTTCTGTAATACTTTTGCGG |
| 79 | TCATTTCAATTACCTGCGCAGAGGCGAATTAT |
| 80 | AAGATGATTCGTCGCTATTAATTATAGCTTAG |
| 81 | ATCAAGACTGATTGCTTTGAATAGTAAAACAG |
| 82 | TTTCATTTTTTACATCGGGAGAATCAGGTTTA |
| 83 | AAGGCAAAGAATTAGCGGTAAAGATTCAAAAG |
| 84 | GCAATAAATACTAATAGTAGTAGCAAGTTTCA |
| 85 | CATAAAGATATTTTAAATGCAATATTCAACCG |
| 86 | TTGTACCTGGGGCGCGAGCTGAATTCTGCGAA |
| 87 | ATGACCCAACGCAAGGATAAAAAGAGAGGGTA |
| 88 | AGTGAATAAGTGAATTTATCAAAACTATATGT |
| 89 | TCATATTTTAATGGAACTACCTTTTTACAACT |
| 90 | TGGTCAATAACCTGTTAGATACATTTCGCAAA |
| 91 | CTTGAAAACATAGCGAATTTTCCCTTAGAATC |
| 92 | ATTAAGACAAGACAAAGAACGCGACATCTTCT |
| 93 | AGTCAATACCTTGCTTCTGTAAAGAAACAAAC |
| 94 | TGAGAGAACAGTACATAAATCAAATTTAACAA |
| 95 | AAAGTACGGTGTCTGGATTAACATCCAATAAA |
| 96 | TTCCATATTGAATATAATGCTGTAAAAGACTT |
| 97 | TTCCCAAAAGGTGGCATCAATTCGCCTCAGAG |
| 98 | CGAGTAGTCATTTTTGCGGATGGTTCAAAGCG |
| 99 | GACCATTTAGCTATATTTTCATTAAAAACATT |
| 100 | AAATGCTGACCGACCGTGTGATAATTTAGTAT |
| 101 | ATATGACCTCCGGCTTGAATAAACACCAAAAG |
| 102 | GAGTACCTTTAATTGCACAGGTCAGGATTAGA |
| 103 | ATATTTTAGTTAATTTGAAAACTTTTTCAAAT |
| 104 | GACCTAAACAGTATAAAGCCAACGATTTAACA |
| 105 | TTGAAATATGCAAATCCAATCGCGCTGAGAAG |
| 106 | TAAATAAAGGTTGGGTTATATAATCATAGGTC |
| 107 | ATTAAGAGGAAGCCCGGCTCAACATGTTTTAA |
| 108 | CAAATATCCTGACTATTATAGTCAGCCAGAGG |
| 109 | TTCGAGCCTTAGAGCTTAATTGCAACAGTTGA |
| 110 | AACCAGAAATGACCATAAATCAAGGATAGCGT |
| 111 | AACTCCATCCTTTTGATAAGAGGATTTAGTTT |
| 112 | CATATGCGGGCATTTTCGAGCCAGGACAATAA |
| 113 | CATCAGGAATCATAATAGTACCGACAAGGCTT |
| 114 | CCTCAAATGCTTTAAAATATTCATTGAATCCC |
| 115 | AATTGAGAATCGCCATCTCAACAGTAGGGCTT |
| 116 | ACGCCAACCGCGCCTGTTTATCAATCCCATCC |
| 117 | AGGCAGATTATACAAATTCTTACTTTAATGGT |
| 118 | AATATAATACTAGAAAAAGCCTGATAAGGCGT |
| 119 | TTGCAAAAGAAGTTTTGAAGCAAAGCGGATTG |
| 120 | GGGTAATACGTTTACCAGACGACGTAATAAAA |
| 121 | TTAGACTAAATCAGGTCTTTACCGCGTTTTAA |
| 122 | CCAATACAGGCATAGTAAGAGCACAGGTAGAA |
| 123 | GTCATAACAGTTCAGAAAACGAGCCGGAAGCA |
| 124 | ACAACATGATCAATAATCGGCTGTACAAGCAA |
| 125 | CGAGAAAGGTAAAGTAAAGAACGGGTAGTTGG |
| 126 | AATGCAGATACATAACAATACCACATTCAACT |
| 127 | AACAAGAAAAATAATACAATAGATAAGTCCTG |
| 128 | TAATTTACATCATTACCGCGCCCACGGTATTC |
| 129 | GAAACCATTCAGCTAATGCAGAAATGTAATTT |
| 130 | TCATTCCATTCTGTCCAGACGACTAATAAGAG |
| 131 | GAAGAAAAATCTACGTATAAAAACCAAAATAG |
| 132 | CGAACTAAGCGATTTTAAGAACTGAACCGGAT |
| 133 | ATTATTAACACTATCATAACCCTGTAAAATGT |
| 134 | AGATTCAATTTCAACTTTAATCAAAAGCTGC |
| 135 | ATTTAGGGCCAAAAGGAATTACGTGCGGAATC |
| 136 | GCCGTTTTACCTCCCGACTTGCGGTTTATCCT |
| 137 | AGGACTTAAACCAAGTAAATCAAGATTATCAA |
| 138 | AACGAGTAGTAAATTGTGACGAGAAACACCAG |
| 139 | ATATAGAAGGCTTATCATAGCAAGCAAATCAG |
| 140 | TAAGAACGTCTTTCCAGAGCCTAATTATCCCA |
| 141 | TTAGCGATATTTTCATCGTAGGAGAGCATGTA |
| 142 | AAGCCTTACCGCACTCATCGAGACTTTCCTTA |
| 143 | GAGTAATCTTGACAAGGCTCATTATACCAGTC |
| 144 | ATTCATTACGGTGTACAGACCAGGACAAAGTA |
| 145 | ACGTAACTTGTGAATTACCTTATCGGAACAAC |
| 146 | TCATTCAGGAACTGACCAACTTTGGATAAATT |
| 147 | CTTGCCCGGCTTGAGATGGTTTATCAGTTGAG |
| 148 | GAATCTTATTTAACGTCAAAAATGGGGAGAAT |
| 149 | CCTTCAGTTGCTATTTCAGAGAGAATAAGCGA |
| 150 | ACGAGGCGCAGACGGTATGTTACTTAGCCGGA |
| 151 | TAAACAGCCATATTATTTTGCCAGTTACAAAA |
| 152 | ATCCAAATAGAGGGTAATTGAGCGGTTAAGCC |
| 153 | TTTTTTGCCAACGCTAACGAGCGCGAGGCGTT |
| 154 | GCCTTTATGCACCCAGCTACAATGAGGTTTTG |
| 155 | TTATACCAAGCGCGAACGCATAGGCTGGCTGA |
| 156 | CAACGGAGGCAAAAGAATACACTACTCAGCAG |
| 157 | ATCGCCTAAAGAGGACAGATGAACCCAAATCA |
| 158 | GTGTCGAACACTACGAAGGCACCATAGCAACG |
| 159 | CTGCTCCCAATCATAAGGGAACCTGAATAAGG |
| 160 | TAACTGAAAAATAGCAATAGCTATAAGGAAAC |
| 161 | CCCCCACATAAAAACATTAAGAAAAGTCGCTT |
| 162 | AGTTTCCATTAAACGGGACTTTTTCATGAGGA |
| 163 | AACCCACAAGAATTGACTAATATCAGAGAGAT |
| 164 | CAATAATATACCCAAAAGAACTGGAGCAAACG |
| 165 | AACAATGCACCCTGAACAAAGTCAAGAAACGA |
| 166 | GCCCTTTGGGAAGCGCATTAGACAAAATAGCA |
| 167 | TTGCGGGATCGTCACCAAACACTCATCTTTGA |
| 168 | CGAAAGACTATATTCGGTCGCTGAGTTGAAAA |
| 169 | ACGAGGGACCTAAAACGAAAGAGATTTGTATC |
| 170 | GCTACAGAAATGACAACAACCATCGAGCCTTT |
| 171 | GACTAAAGTAAAATACGTAATGCATCCGCGAC |
| 172 | CGAGGAAACAACATATAAAAGAAATGGTTTAC |
| 173 | AAGGCAAGCAGATAGCAATAAGTTTATTGCGA |
| 174 | TTAAACAGCTTGATACTTTCGAGGTGAATTTC |
| 175 | TATTACGCAGTATGTTCATGATTAAGACTCCT |
| 176 | TAGAAAATATTCAACCGATTGAGGTTAAAGGT |
| 177 | AAGGTGGCGCAATAATAACGGAAAGAGCAAGA |
| 178 | ACCACGGCGAACAAAGTTACCAGCTTACCGAA |
| 179 | ATAATAATTTTTTCACGGCTTGCAGGGAGTTA |
| 180 | TCTCCAAACAGCGGAGTGAGAATACGTCACCA |
| 181 | CCAAAAGGCCCACGCATAACCGAAGCATCGGA |
| 182 | AATTGTATATGGGATTTTGCTAAATTCCACAG |
| 183 | AGCTTGCCGATAGTTGCGCCGACGGCTTTGAG |
| 184 | CAGCGCCAGCCATTTGGGAATTAGCAATGAAA |
| 185 | GGAATTTTGTCACAATAGTAGCACCATATGTA |
| 186 | TCTTTCCAGACGTTAGATCTAAAGTTTTGTCG |
| 187 | TGACGGAAATTATTCAGAGGGAAGGTAAATAT |
| 188 | GAATTATCGTAGCGACAGAATCAATCATCGGC |
| 189 | GACTTGAAAGACAAAAGGGCGACACATACATA |
| 190 | AATCACCCAATAGAAAATTCATACGCAAAGAC |
| 191 | CCGTAACACTGAGTTTGAAAGGAACAACTAAA |
| 192 | GTACAAACCCCTCATTTTCAGGGATTTTGCTC |
| 193 | TGTAGCACAACTTTCAACAGTTTAAAAAGGCT |
| 194 | ACAGCCCTCACCCTCAGAACCGCCGAGAGGGT |
| 195 | CGTAACGTAAATGAATTTTCTGTCGGTTTATC |
| 196 | CCATCGATAGCGTTTGCCATCTTTCCGCCACC |
| 197 | AACCCTACCATTAGCACGGAACCAGAGGAAGG |
| 198 | AGGAGGTTTAGTACCGGTGTATCACCGTACTC |
| 199 | AGACTGTAGCGCGTTTGTTTGCCTTTAGCGTC |
| 200 | ATTTTCGGACCACCCTCAGAGCCGATTGA |
| 201 | CCTTATTAGCAGCACCGTAATCAACCGTCACC |
| 202 | AAATCACAGGCCGGAAACGTCACAGCCAGCAA |
| 203 | ATTAGGATTAGCGGGGTAGCAAGCCCAATAGG |
| 204 | AGTACCAGAAACATGAAAGTATTATTTAC |
| 205 | TGCCGTCACCCTCAGAGCCACCATACAACGCC |
| 206 | TGATATAAGCCCCCTGCCTATTTCTTGAT |
| 207 | GGAATAGCCACCCTCAGAACCGCCATAGTTAG |
| 208 | CTCAGAACGGCCTTGATATTCACAAACAAATA |
| 209 | CAAGACCACCACCGGATTAAAGCCAGAATGGA |
| 210 | CTTGAGTAACAGTGCCTTAACGGGGTCAGTGC |
| 211 | CAGAGCCGCCGCCAGCCCACCAGAACCACCAC |
| 212 | CAGGAGGTTGAGGCAGGTCAGA |
| 213 | CGATTCGCCACCCTCAGAGCCTCATAGCCC |
| 214 | AATCCTCAACCGCCTCCCTCAGAGTCATAATCA |
| 215 | AAGCGCAGTCTCTGAAAGAGGCTGAGACTCCT |
| 216 | CGTTCCAGTAAGCGTCATACAT |
| 217 | GGCTTGGAACCTATTATTCTGGCGGATAAG |
| 218 | GATACAGGAGTGTACTGGTAAT |
| 219 | AAGTTCGTATAAACAGTTAATGTATAGCCC |
